# Supplementary material for: Tissue miRNA Combinations for the Differential Diagnosis of Adrenocortical Carcinoma and Adenoma Established by Artificial Intelligence
Source: MDPI journal article supplement (doi:10.3390/cancers14040895), 2022-02-11
Supplement: s1 [file s1]

**Supplementary Table S1.** Clinical and main pathological characteristics of the tumor samples included. F: female, M: male, NF: non-functioning, DHEAS: dehydroepiandrosterone sulfate, DOC: 11-Deoxycorticosterone, ND: no data. Bold: false positive (red) or false negative (blue) samples by the three best performing models.

| Discovery cohort  | Tumor type | Sex           | Age at sampling      | Tumor size (mm) | Ki-67 (%) | ENSAT stage | Hormonal activity        |
|-------------------|------------|---------------|----------------------|-----------------|-----------|-------------|--------------------------|
| D1                | ACA        | female        | 32                   | 36              | -         | -           | Cortisol                 |
| D2                | ACA        | female        | 40                   | 43              | -         | -           | Cortisol                 |
| D3                | ACA        | female        | 62                   | 50              | -         | -           | Cortisol                 |
| D4                | ACA        | female        | 74                   | 20              | -         | -           | NF                       |
| D5                | ACA        | female        | 51                   | 25              | -         | -           | Cortisol                 |
| D6                | ACA        | female        | 71                   | 15              | -         | -           | NF                       |
| D7                | ACA        | female        | 30                   | 25              | -         | -           | Cortisol                 |
| D8                | ACA        | female        | 43                   | 45              | -         | -           | Cortisol                 |
| D9                | ACA        | female        | 38                   | 35              | -         | -           | Cortisol                 |
| D10               | ACA        | female        | 34                   | 45              | -         | -           | NF                       |
| D11               | ACC        | female        | 39                   | 65              | ND        | II          | Cortisol                 |
| D12               | ACC        | male          | 40                   | 100             | 1-15      | II          | NF                       |
| D13               | ACC        | female        | 19                   | 150             | 10        | III         | DOC                      |
| D14               | ACC        | male          | 48                   | 200             | 2-5       | III         | NF                       |
| D15               | ACC        | female        | 37                   | 60              | 2-5       | III         | DOC, cortisol, estradiol |
| D16               | ACC        | male          | 58                   | 75              | 30        | III         | Cortisol                 |
| D17               | ACC        | female        | 73                   | 65              | 30-40     | II          | NF                       |
| D18               | ACC        | male          | 39                   | 85              | 5-10      | II          | NF                       |
| D19               | ACC        | female        | 53                   | 62              | 5         | II          | NF                       |
| D20               | ACC        | female        | 46                   | 100             | ND        | III         | Cortisol                 |
| Validation cohort | Tumor type | Sex           | Age at sample taking | Tumor size (mm) | Ki-67 (%) | ENSAT stage | Hormonal activity        |
| V1                | ACA        | female        | 63                   | 25              | -         | -           | NF                       |
| V2                | ACA        | female        | 46                   | 25              | -         | -           | Cortisol                 |
| V3                | ACA        | female        | 45                   | 30              | -         | -           | Cortisol                 |
| V4                | ACA        | male          | 68                   | 50              | -         | -           | NF                       |
| V5                | ACA        | female        | 64                   | 38              | -         | -           | Cortisol                 |
| V6                | ACA        | female        | 39                   | 25              | -         | -           | Cortisol                 |
| V7                | ACA        | female        | 32                   | 35              | -         | -           | Cortisol                 |
| V8                | ACA        | male          | 72                   | 40              | -         | -           | NF                       |
| V9                | ACA        | female        | 31                   | 25              | -         | -           | Cortisol                 |
| V10               | ACA        | female        | 72                   | 43              | -         | -           | NF                       |
| V11               | ACA        | female        | 78                   | 45              | -         | -           | DHEAS                    |
| V12               | ACA        | female        | 45                   | 30              | -         | -           | Cortisol                 |
| V13               | ACA        | female        | 39                   | 35              | -         | -           | NF                       |
| <b>V14</b>        | <b>ACA</b> | <b>female</b> | <b>50</b>            | <b>52</b>       | <b>-</b>  | <b>-</b>    | <b>Cortisol</b>          |
| V15               | ACA        | female        | 60                   | 32              | -         | -           | NF                       |
| V16               | ACA        | female        | 49                   | 25              | -         | -           | Cortisol                 |
| V17               | ACA        | female        | 34                   | 25              | -         | -           | NF                       |
| V18               | ACA        | male          | 46                   | 57              | -         | -           | NF                       |
| <b>V19</b>        | <b>ACA</b> | <b>male</b>   | <b>50</b>            | <b>30</b>       | <b>-</b>  | <b>-</b>    | <b>NF</b>                |
| V20               | ACA        | female        | 62                   | 57              | -         | -           | Cortisol                 |
| V21               | ACA        | female        | 69                   | 30              | -         | -           | NF                       |

|            |            |               |           |            |          |            |                    |
|------------|------------|---------------|-----------|------------|----------|------------|--------------------|
| V22        | ACA        | male          | 71        | 18         | -        | -          | Cortisol           |
| V23        | ACC        | female        | 47        | 140        | 20-25    | II         | NF                 |
| V24        | ACC        | female        | 53        | 80         | 40-50    | IV         | Cortisol, androgen |
| V25        | ACC        | female        | 70        | 120        | 20       | III        | NF                 |
| V26        | ACC        | female        | 75        | 75         | 40-50    | IV         | Cortisol           |
| V27        | ACC        | female        | 71        | 100        | 25       | IV         | NF                 |
| V28        | ACC        | female        | 46        | 200        | 43       | IV         | NF                 |
| V29        | ACC        | male          | 33        | 190        | ND       | II         | Cortisol, DHEAS    |
| V30        | ACC        | male          | 43        | 120        | ND       | IV         | NF                 |
| V31        | ACC        | male          | 56        | 65         | 20-40    | II         | NF                 |
| V32        | ACC        | female        | 72        | 95         | 20-30    | III        | Cortisol           |
| <b>V33</b> | <b>ACC</b> | <b>female</b> | <b>62</b> | <b>160</b> | <b>8</b> | <b>III</b> | <b>Cortisol</b>    |
| V34        | ACC        | male          | 17        | 110        | 20-25    | II         | NF                 |
| V35        | ACC        | female        | 49        | 40         | ND       | I          | NF                 |
| V36        | ACC        | female        | 61        | 80         | 20-30    | III        | Cortisol           |
| V37        | ACC        | female        | 61        | 100        | ND       | IV         | NF                 |
| V38        | ACC        | male          | 79        | 120        | 10       | III        | Cortisol, DHEAS    |
| V39        | ACC        | female        | 55        | 75         | 20-25    | IV         | Cortisol           |
| V40        | ACC        | male          | 48        | 61         | 10       | IV         | Cortisol           |
| V41        | ACC        | female        | 62        | 60         | 40-50    | IV         | Cortisol           |
| V42        | ACC        | female        | 55        | 55         | 25       | IV         | NF                 |
| V43        | ACC        | male          | 48        | ND         | ND       | IV         | NF                 |
